# Supplementary material for: CaMKII activation participates in doxorubicin cardiotoxicity and is attenuated by moderate GRP78 overexpression
Source: PLoS One. 2019 Apr 29;14(4):e0215992. doi: 10.1371/journal.pone.0215992 (PMC6488194; doi:10.1371/journal.pone.0215992)
Supplement: S2 File — (XLSX) [file pone.0215992.s021.xlsx]

## Sheet: Fig 1
A
GRP78 (KDEL)	µM Doxorubicin
	0	0.05	0.1	0.5	1
	1	0.894846	0.793788	0.451977	0.435391
	1	0.860926	0.963745	0.518076	0.386852
	1	1.16327	0.557506	0.802889	0.49042
GRP78 (mRNA)	µM Doxorubicin
	0	0.05	0.1	0.5	1
	1		1.13818	0.779343	0.68291
	1		0.776086	0.886011
	1		0.75646	0.384147	0.625651
	1	0.615969	1.37055	0.535825	0.255575
	1	0.706466	1.02362	0.513419	0.0660292
B
GRP78 (KDEL)	Time of Dox Treatment
	0h	3h	16h	24h	48h
	1	1.49087	0.571012	0.755085	1.19299
	1	0.744529	0.555166	0.754109	1.03595
	1	0.961578	0.365289	0.649114	0.96711
	1	1.59307	0.739695	0.510396	0.524974
	1	0.715638	0.455102	0.326705	0.169443
C
Cleaved Caspase 3		Time of Dox Treatment
	0h -	0h	3h	16h	24h	48h
	0.464679	0.741875	3.63496	4.18493	5.84756	14.4351
	0.0422147	0.126714	0.126462	1.31942	1.63685
	0.862893	0.238069	1.22204		8.66705	15.5447
	0.0872673	0.0877689	0.144037	1	1.71945	4.00979
p53		Time of Dox Treatment
	0h -	0h	3h	16h	24h	48h
	0.0551179	0.09168	0.471223	2.20877	1.66781	0.647344
	0.0351924	0.0341799	0.361444	3.33343	2.92058
	0.158355	0.0745664	0.75567		2.99338	1.23038
	0.00883788	0.0076355	0.0139077	1.46471	1.20653	0.441187
	0.471845	0.234682	1.13469	2.90409	1.91859	0.659661
D
ToxiLight Assay		untreated				1µM Doxorubicin
	0h	1	1	1	1	1.14532	0.676348	0.975883	0.74804
	3h		1.16709	0.540318	1.28605	1.36778	0.546431	1.13651
	16h		2.10128	0.97732	2.15385	6.90896	2.89617	5.26661
	24h	0.621457	2.65113	1.26357	3.40922	10.5208	6.31017	8.16506	3.73393
	48h	0.928763		1.92295	3.55499		19.0391	30.4164	21.0648

## Sheet: Fig 2
A
pPLN/PLN		Time of Dox Treatment
	0h -	0h	3h	16h	24h	48h
	0.284023	0.378409	0.506642	3.73822	13.9874	0.262091
	0.113394	0.204216	0.238228	2.36007	7.70554	0.629832
	0.4537	0.317581	0.489255	1.20451	0.82458	0.0875838
	0.521453	0.574134	0.261501	7.82865	5.30979
pCamKII/CamKII		Time of Dox Treatment
	0h -	0h	3h	16h	24h	48h
	1	0.95997	0.927843	0.832163	1.03573	2.53751
	1	0.985038	1.20934	1.59417	1.56326	4.57946
	1	1.00767	1.3578	1.321	2.11476	9.10014
B
H2O2 Production		untreated			Dox
	16h	1125.3	1873.94	2038.73	1563.85	618.087	1369.21
	24h	3371.28	3175.76	809.354	423.726	6318.14	3588.03
C
SR Calcium		untreated						Dox
	1h			627.479	592.653		693.048		683.945	654.68	561.148	515.644	589.485
	6h		676.173	652.839		564.776			603.53	719.125	543.395	448.889
	16h		733.626	712.149		542.911	572.611		492.667	450.181	451.339	511.18	490.321
	24h	511.288		632.302	661.001			639.736		637.383	670.308	547.23
Transient Amplitude		untreated					Dox
	1h	1	1	1	1	1	1.10103	1.29392	0.971891	1.20019	0.997551
	6h	1.23632	1.19889		1.03599		0.743176	1.10044	1.0391	0.993189
	16h	0.981243	1.26097		1.07874	1.08532	0.924946	0.888401	0.765247	1.07889	0.843191
	24h		1.30232	0.905406	1.21056	0.93715		1.27412	0.918031	0.991818	0.877202
Diastolic Calcium		untreated					Dox
	1h	1	1	1	1	1	1.11145	0.975136	0.975762	1.08604	0.973704
	6h	1.02964	0.933346		1.02994		1.07025	0.967061	0.94289	1.00382
	16h	1.07061	0.883435		0.995985	1.06676	1.03805	0.859955	0.920689	0.950158	1.13799
	24h		0.887375	1.01726	0.967229	0.861671		0.903074	0.922567	1.07206	0.879802

## Sheet: Fig 3
Cleaved Caspase 3		DMSO				DMSO + Dox				BAPTA + Dox
	24h	0.113664	0.071286	0.0302777	0.100592	0.602675	0.753166	0.198604	0.857228	0.333437	0.372044	0.119038	0.156655
	48h	0.379856	0.0624966	0.0232292	0.0496902	2.39671	4.50711	7.46142	6.43527	0.895629	0.733861	0.248436	0.749654
pCamKII/CamKII		DMSO				DMSO + Dox				BAPTA + Dox
	24h	0.287348	0.48026	0.144743	0.315626	1.35596	1.51367	0.228228	1.66298	0.112787	0.867453	0.185797	0.482466
	48h	0.12848	0.311386	0.0617202	0.414937	2.91604	2.75777	3.23103	5.0839	1.06062	1.24507	0.815632	2.14642
pPLN/PLN		DMSO				DMSO + Dox				BAPTA + Dox
	24h	0.00831019	1.14743	0.0528226	0.0359084	0.239567	2.13974	2.5144	0.903944	0.0195521	0.357867	0.0841419	0.120352
	48h	0.0118081	0.132978	0.0475367	0.156013	0.0312048	0.216081	0.575892	0.283375	0.0213022	0.305096	0.272336	0.0723697
p53/GAPDH		DMSO			DMSO + Dox			BAPTA + Dox
	24h	0.0297132	0.0354598	0.0267732	1.36352	1.99538	1.14179	0.433085	1.10738	0.497215
	48h	0.0472159	0.0295518	0.0189177	0.381534	0.434275	0.350305	0.366954	0.469416	0.289618

## Sheet: Fig 4
A
cleaved Caspase 3		untreated					Dox					Dox AIP
	24h	0.0238504	0.0494983	0.0519419			0.160901	0.378134	0.211217			0.144669	0.303777	0.496753
	48h	0.0238637	0.045083	0.0756251	0.487327	0.476767	3.01258	5.86254	7.9222	4.87129	1.89346	3.67578	3.20772	2.60391	1.86715	2.44301
B	Ctrl.		1 µM Doxo
TUNEL Assay	Ctrl.	AIP	Ctrl.	AIP
	0.0476953	0.149921	0.625398	0.573158
	0.0898886	0.066117	0.633263	0.399237
	0.127144	0.0762263	0.260356	0.153285
	0.340533	0.355135	0.731904	0.635059
	0.190324	0.362985	0.791342	0.713888
	0.281175	0.178243	0.551794	0.416742
D	Ctrl.		1 µM Doxo
Cleaved Caspase 9	Ctrl.	AIP	Ctrl.	AIP
	1	1.96829	0.631953	1.28563
	1	2.20237	0.879844	1.58024
	1	2.31809	0.69357	1.90956
	1	2.07349	0.967801	1.99218
	1	1.86635	0.873228	1.72362
F	Ctrl.		1 µM Doxo
AIF Translocation	Ctrl.	AIP	Ctrl.	AIP
	1	0.960063	1.10471	1.05743
	1	0.992453	1.16767	1.20843
	1	1.01684	1.13904	1.10229

## Sheet: Fig 5
A
Dose-dependence	fold	CaspGRP78/CaspLuc
	1-1,5	0.766738	0.925365	0.351212	0.964862	0.346487	2.08151	1.00447
	1,5-2	0.599834	1.28083	0.65873	0.664062	1.20045
	2-2,5	0.76618	0.249968	0.275395	1.98372	0.471842	0.838282	0.642823	0.713109	1.21414	1.77682	0.502747	0.548053
	2,5-3	0.823143	0.490047	1.9609	1.70374	0.55509
	3-4	0.680311	0.803078	1.79716	1.93123	1.86737	0.6978	1.65404
	4-5
	5-6	1.56262
	6-7	1.0737
B	Ctrl.	Dox-treated
GRP78 Expression	0 h	0 h		24 h		35 h		48 h
	AAV-Luc	AAV-Luc	AAV-GRP78	AAV-Luc	AAV-GRP78	AAV-Luc	AAV-GRP78	AAV-Luc	AAV-GRP78
	1			0.692756	1.14483	0.777375	1.57233	0.867942	2.04832
	1			1.05043	3.00589
	1	0.680347	2.00668	1.16243	2.20066	0.692182	1.88999	1.25366	2.54434
	1	2.20754		0.680201	3.21021
	1	1.4016		1.33583	2.58831
	1	1.05169	0.912662	1.01547	1.77482	0.722264	1.92177	1.88533	2.74471
	1	1.07717	1.56008	0.654213	3.65777
	1	0.795168	0.962932	0.797589	1.35413	0.812958	1.40704	0.923736	1.47443
Cleaved Caspase 3
	Ctrl.	Dox-treated
	0 h	0 h		24 h		35 h		48 h
	AAV-Luc	AAV-Luc	AAV-GRP78	AAV-Luc	AAV-GRP78	AAV-Luc	AAV-GRP78	AAV-Luc	AAV-GRP78
	0.0214791	0.0455798	0.0214942	1.00578	0.930711	1	1.2944	3.14912	2.41279
	0.023666	0.0174572	0.0274605	0.535418	0.147452	1	1.6494	2.92699	2.40933
	0.0818237	0.0422785		0.55781	0.379484
				0.563038	0.337729	1	0.982386	3.71997	1.82296
	0.0863685	0.0671447	0.0565495	0.526595	0.422897
	0.0184789	0.0524315	0.0390166	0.157526	0.0553252	1	0.688442	1.90104	1.4576
C
p53
		AAV-Luc					AAV-GRP78
	0h	0.832114	1.81329	0.354595			0.508949	1.73662	1.9018
	24h	18.6758	32.6439	7.01079	15.7755	23.869	14.3709	14.8726	4.22425	14.5659	11.4063	10.5362	8.25077
D
TUNEL Assay	35 h Dox		48 h Dox
	AAV-Luc	AAV-GRP78	AAV-Luc	AAV-GRP78
	23.8869	21.9191	45.4734	22.4056
	17.2016	14.1825	35.0173	31.1557
	23.9241	17.3567	37.2073	31.6535
			37.0358	35.6613
			49.2539	39.2587

## Sheet: Fig 6
A
pPLN/PLN
		AAV-Luc							AAV-GRP78
	0h	0.15988		0.00759174	0.00703297					0.0110937	0.00583445	0.00633775
	24h	0.296296	0.420513	0.0396171	0.0446012	0.0322936	0.00473913	0.305869	0.0203521	0.0164444	0.0323987	0.0293548	0.00526718	0.00108714	0.0139918
	48h	0.0127119	0.0081295	0.00580551	0.00691892	0.00399773	0.00104433		0.0110651	0.0113869	0.00675084	0.00578167	0.00169652	0.000680583
PLN/GAPDH
		Dox AAV-Luc				Dox AAV-GRP78
	0h	0.948858	1.11324	1.13647		0.97272	0.932257	1.40681
	24h	0.738524	1.10781	0.896477	0.935775	0.689107	0.780144	0.938976	1.0977
	48h	0.75951	0.982939	1.09432	1.04466	0.980529	0.858441	1.12504	0.922203
B
pCamK/CamKII
		AAV-Luc				AAV-GRP78
	0h	0.0573688	0.122552	0.0291774		0.10759	0.0443354	0.0573063	0.0441696
	24h	0.23065	0.137104	0.0429705	0.234719	0.0837757	0.0580283	0.0618549	0.131804
	48h	0.311535	0.214237	0.79963	0.543938	0.126351	0.181005	0.427886	0.0531859
CamKII/GAPDH
		Dox AAV-Luc				Dox AAV-GRP78
	0h	0.788359	0.568799	1.30638			1.6267	0.538605	1.61339
	24h	0.619893	0.559124	1.23529	0.745689	0.685871	0.768112	0.898612	0.694445
	48h	0.631436	0.717784	0.649984	0.493933	0.609767	0.598402	0.538104	0.469814

## Sheet: Fig 7
A
GRP78 expression	Control		Doxorubicin
	AAV-Luc	AAV-GRP78	AAV-Luc	AAV-GRP78
	0.717795	1.55253	0.621685	2.65907
	1.47988	1.09426	0.52672	2.69497
	0.802329	2.22499	0.841602	2.87091
		2.28135	1.1873	3.16887
			0.75722	2.91166
			0.802162	2.11623
			0.955414	2.50951
			1.13901	3.01925
				2.45028
				2.57193
				3.67587
				3.94093
B		Doxorubicin
hsTNT	Ctrl.	AAV-Luc	AAV-GRP78
	50	190	190
	60	220	140
		240	170
		190	130
		150	140
			110
			160
C
dPdt max	Control		Doxorubicin
	AAV-Luc	AAV-GRP78	AAV-Luc	AAV-GRP78
	8894.4	5480.9	3452.8	5417.8
	7085.6	6042	4435.9	4159.2
	8288.8	8825.7	5066	6696
	8827.2	6225.4	3133	5373
	8054.2	7885	4244	4312
	5840	7046	5452	7783
	5727	8045	3868.7	5133.82
	5231	6286	6566.33	6333.98
	6196	5805	4964.36	7341.12
		5888	6613.47	6244.97
			5825.14	5538.99
			4268.75	8769.72
			5746.95	5769.13
			7884.99	6101.88
				7319.68
D	Control		Doxorubicin
dPdt min	AAV-Luc	AAV-GRP78	AAV-Luc	AAV-GRP78
	-7497.2	-6558.2	-2935.2	-4723.6
	-5598.3	-6662.5	-1966.2	-4273.9
	-6294.3	-7041.7	-4469	-6337
	-5824.9	-5316.7	-1899	-4697
	-6891.8	-6204	-2308	-3870
	-5913	-5971	-5101	-4476
	-5419	-6244	-3758.81	-4116.95
	-4055	-6140	-4645.92	-6404.38
	-5947	-5504	-5060.58	-6716.37
		-5276	-4689.13	-4804.76
			-5156.32	-5020.71
			-3772.14	-8691.3
			-5171.49	-4942.26
			-6724.95	-5526.25
				-7486.9
Tau Mirsky	Control		Doxorubicin
	AAV-Luc	AAV-GRP78	AAV-Luc	AAV-GRP78
	7.8	9.4	15.9	14.6
	9.6	11.9	26.1	13.7
	11.5	14.8	12.37	11.222
	8.9	11	23.857	12.722
	12.667	10.4	22.467	16.444
	11.667	10	14.188	13.474
	16.708	11.243	10.667	11.479
	10.625	11.8	13.438	9.762
		12	10.167	10.2
			10.583	10.867
			9.69	9.778
			10.625	8.765
				8.857
				10.188
				10.938
E
Survival	Days after Treatment	Control		Doxorubicin
		AAV-Luc	AAV-GRP78	AAV-Luc	AAV-GRP78
	37	0
	37	0
	37	0
	37	0
	37	0
	37		0
	37		0
	37		0
	37		0
	37		0
	37			0
	37			0
	37
	37
	37
	36			1
	34
	27			1
	26			1
	37				0
	37				0
	37				0
	37
	37
	36				1
	34				1
	45	0
	45	0
	45	0
	45	0
	45	0
	45		0
	45		0
	45		0
	45		0
	45		0
	45			0
	45			0
	45			0
	45			0
	45			0
	45				0
	45				0
	45				0
	45				0
	45				0
	45				0
	45			1
	45			1
	43				1
	39				1
	37			1
	28			1
	27			1
	24			0
	23			1
	20			1
	24			0
	23			1
	23			1
	27			0
	3			1
	27			0
	27			0
	27			0
	27			0
	27			0
	27			0
	27				0
	27				0
	19				1
	27				0
	27				0
	27				0
	24				0
	24				0
	24				0
	24				0
	24				0
	24				0
	24			0
	23			1
	20			1
	24			0
	23			1
	23			1

## Sheet: S1 Fig
A
FS	Control		Doxorubicin
	AAV-Luc	AAV-GRP78	AAV-Luc	AAV-GRP78
	31.4364	30.9833	34.2261	41.5944
	35.8706	42.7627	35.487	34.9396
	42.5613	31.5854	40.8444	58.8582
	44.5121	38.9736	43.9439	39.6362
	35.1221	36.1442	32.6131	42.1444
			40.6989	34.1776
			31.2033	28.5081
			27.8758	33.884
			33.4968	31.2707
			38.645	36.4339
			31.6325	27.8514
			28.3601	35.9824
				25.7727
				31.5167
EF PV Loop	Control		Doxorubicin
	AAV-Luc	AAV-GRP78	AAV-Luc	AAV-GRP78
	30.1	36.5	24.9	50.4
	45.4	31.8	29.1	28.3
	34.6	30	47.65	34.486
	33.7	44.8	31.018	41.295
	31.9	34.9	16.111	53.172
	46.571	35.904	29.504	26.874
	33.5	49.938	39.987	23.542
	43.722	39.8	40.518	47.883
	53.793	46.913	47.463	40.006
	44.306	47.351	63.403	48.715
	69.014	44.387	23	53.028
	54.87	53.232	82	52
	60.424	67.557	61	49
	63.444		55	22
			37	34
			43	22
			57	33
			43	34
				55
				45
				36

## Sheet: S2 Fig
ESP	Control		Doxorubicin
	AAV-Luc	AAV-GRP78	AAV-Luc	AAV-GRP78
	83.8	80.6	60.6	80
	73.5	103.2	64.3	76.8
	93.8	135	81.827	101.443
	79	75.1	61.425	78.477
	80.1	94.2	57.167	87.022
	90.7	86.802	94.248	85.426
	98.195	88.566	56	78.263
	88.148	85.826	70	92.719
	86.342	90.634	62	65
	79.649	92.537	69	80
	93.541		69	74
			55	84
			72	71
			82	70
				98
				56
				68
				90
Pmax	Control		Doxorubicin
	AAV-Luc	AAV-GRP78	AAV-Luc	AAV-GRP78
	102.735	94.538	91.67	105.889
	96.496	100.329	67.12	82.539
	92.375	95.315	60.122	95.502
	87.911	98.239	96.798	89.888
	99.363	97.811	81.089	80.792
			69.896	103.645
			77.568	85.053
			79.872	76.554
			65.851	96.111
			78.191	77.257
			92.739	79.534
				87.226
				67.141
				80.863
				94.812

## Sheet: S3 Fig
A
mRNA Expression
	Untreated	Doxorubicin
	1.79627	0.949342
	1.04972	1.14472
	1.94531	0.837987
		1
		1.57462
		1.23542
		1.29684
Protein Expression
	Untreated	Doxorubicin
	0.139157	0.114773
	0.104712	0.106433
	0.113966	0.141916
		0.129762
		0.128313
		0.19685
B
mRNA Expression	Untreated	Doxorubicin
	1.68763	0.673617
	1.09051	0.965936
	0.628507	0.82645
	0.926588	0.494828
		0.624165
		0.471392
		0.840896
		0.326465
		0.099098
		0.576343
Protein Expression
	Untreated	Doxorubicin
	1	0.825369
	0.869967	0.826615
	0.940139	0.706513
		0.738353
		0.669849

[truncated: 3 more sheets: S4 Fig, S5 Fig, S6 Fig]
